# Supplementary material for: Total Phenolic and Flavonoid Content and Biological Activities of Extracts and Isolated Compounds of Cytisus villosus Pourr
Source: MDPI journal article supplement (doi:10.3390/biom9110732), 2019-11-13
Supplement: s1 [file s1]

## SUPPLEMENTARY MATERIAL

Article

# Total Phenolic and Flavonoid Content and Biological Activities of Extracts and Isolated Compounds of *Cytisus villosus* Pourr.

Farida Larit <sup>1,2,\*</sup>, Francisco León <sup>1,3</sup>, Samira Benyahia <sup>4</sup> and Stephen J. Cutler <sup>1,5</sup>

<sup>1</sup> Department of BioMolecular Sciences, School of Pharmacy, University of Mississippi, University, city, state abbreviation, MS 38677-1848, USA

<sup>2</sup> Département de Chimie, Faculté des Sciences Exactes, Université des Frères Mentouri Constantine 1, Constantine, Route d'Aine El Bey 25000, Constantine, Algeria

<sup>3</sup> Department of Medicinal Chemistry, College of Pharmacy, University of Florida, Gainesville, FL 32610, USA

<sup>4</sup> Laboratoire de Synthèse Organique, Modélisation et Optimisation des Procèdes (LOMOP), Université Badji Mokhtar, Faculté des Sciences, Département de Chimie, 23000 Annaba, Algeria; samira.benyahia13@gmail.com

<sup>5</sup> College of Pharmacy, University of South Carolina, Columbia, SC 29208, USA

\* Correspondence: laritfarida@umc.edu.dz; Tel.: +213-664-79-89

Received: 19 October 2019; Accepted: 11 November 2019; Published: date

## List of Contents

Figure S1.  $^1\text{H}$  NMR spectrum of compound 1

Figure S2.  $^{13}\text{C}$  NMR spectrum of compound 1

Figure S3. HRESIMS (-) for compound 1

Figure S4.  $^1\text{H}$  NMR spectrum of compound 2

Figure S5.  $^{13}\text{C}$  NMR spectrum of compound 2

Figure S6. Negative HRESIMS for compound 2

Figure S7.  $^1\text{H}$  NMR spectrum of compound 3

Figure S8.  $^{13}\text{C}$  NMR spectrum of compound 3

Figure S9. Negative HRESIMS for compound 3

Figure S10.  $^1\text{H}$  NMR spectrum of compound 4

Figure S11.  $^{13}\text{C}$  NMR spectrum of compound 4

Figure S12. Negative HRESIMS for compound 4

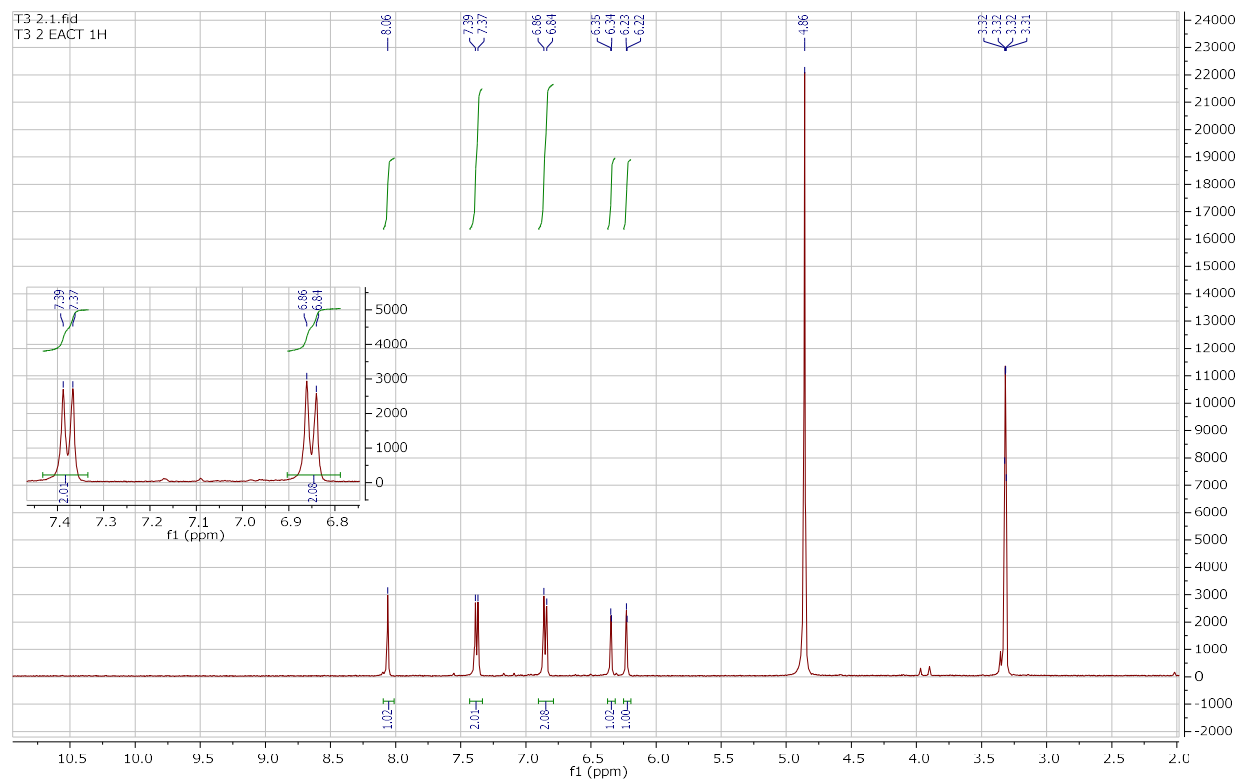

**Figure S1:  $^1\text{H}$  NMR spectrum of compound 1**

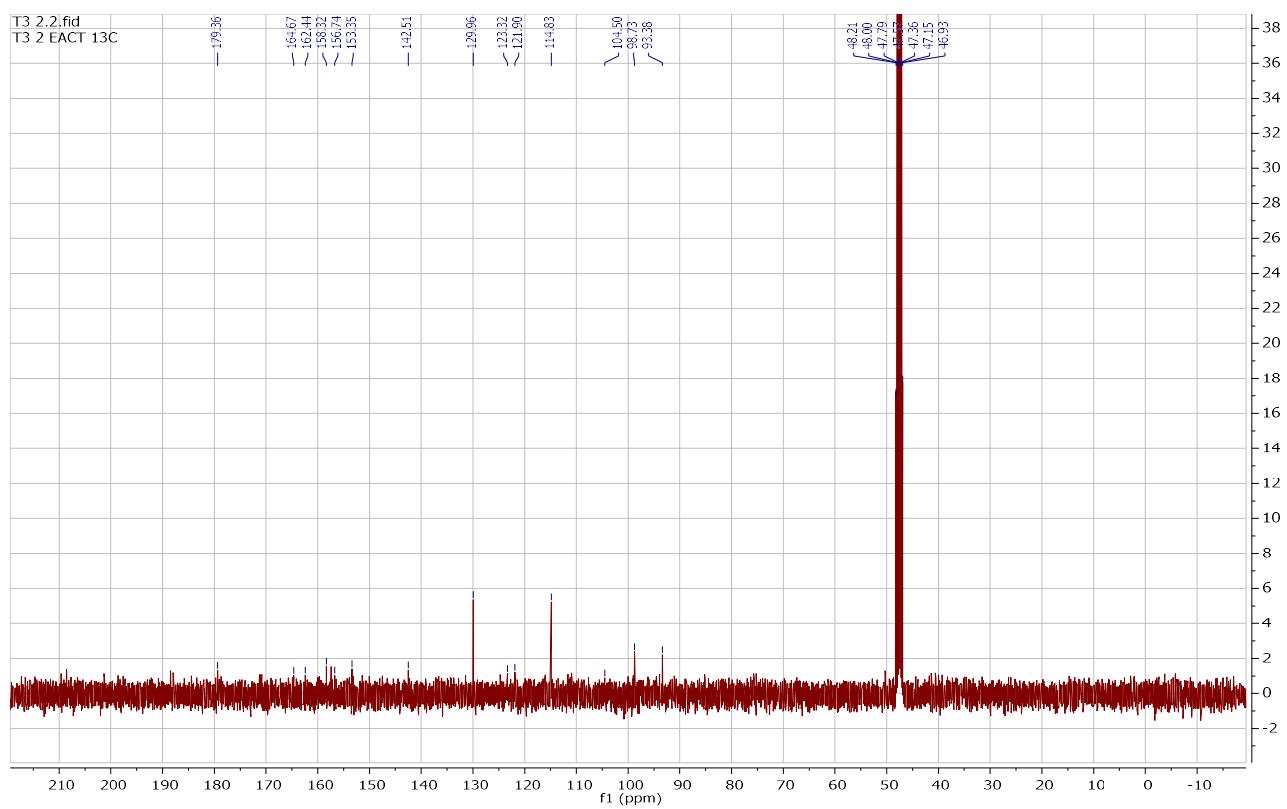

**Figure S2:  $^{13}\text{C}$  NMR spectrum of compound 1**

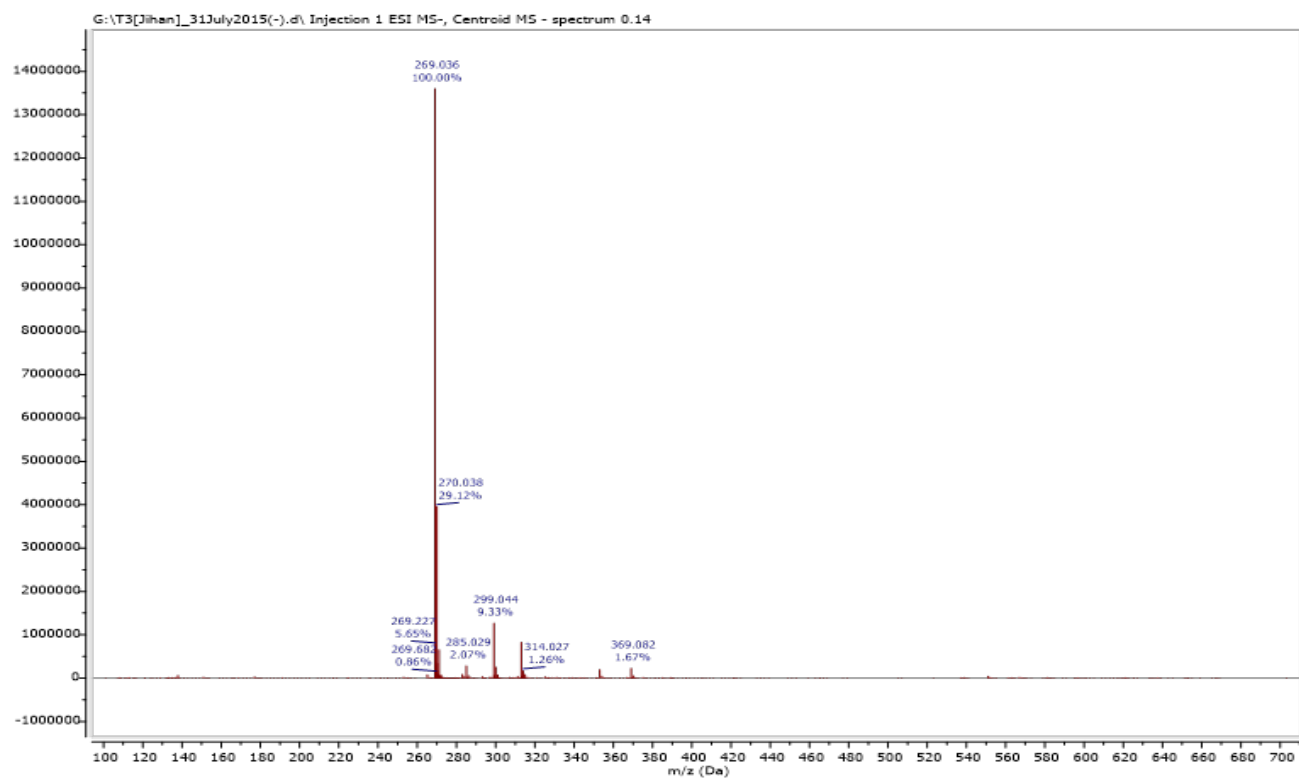

**Figure S3: Negative HRESIMS for compound 1**

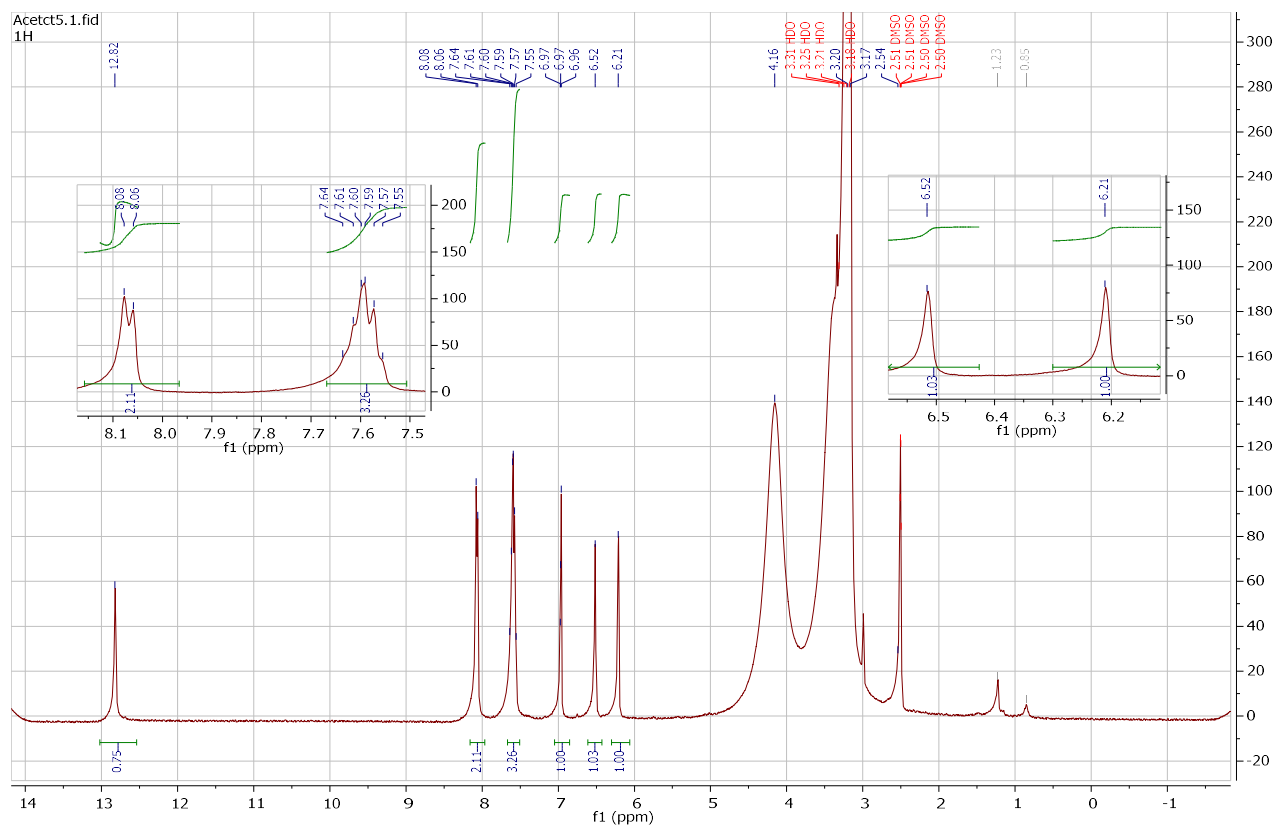

**Figure S4:  $^1\text{H}$  NMR spectrum of compound 2**

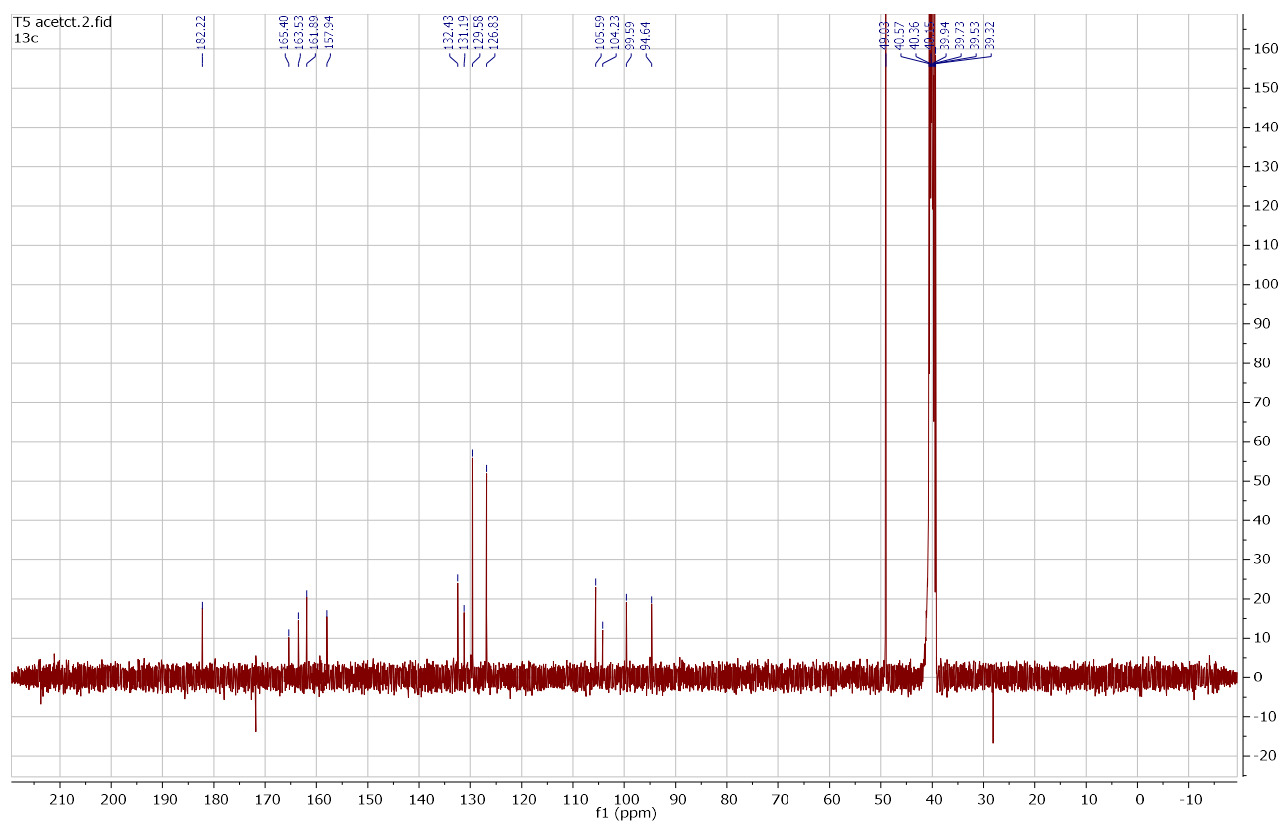

**Figure S5:  $^{13}\text{C}$  NMR spectrum of compound 2**

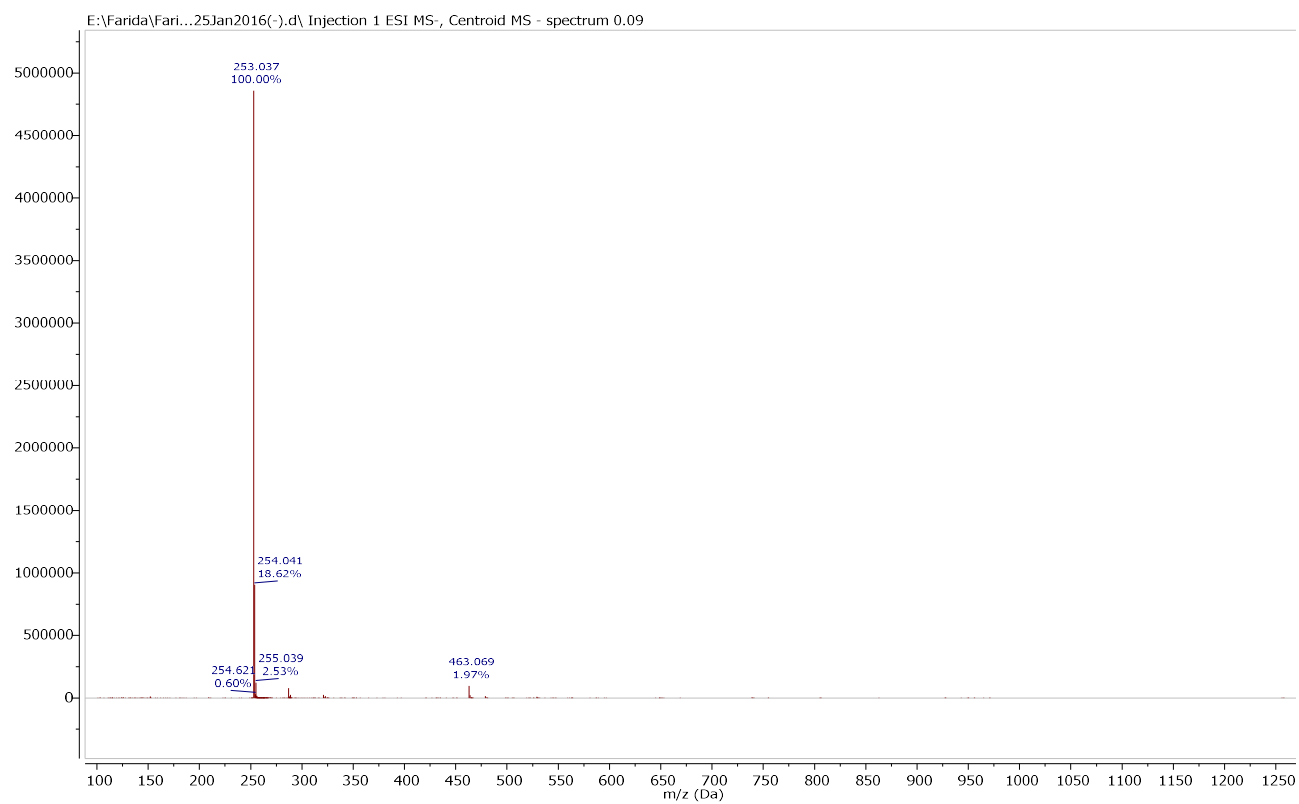

**Figure S6: Negative HRESIMS for compound 2**



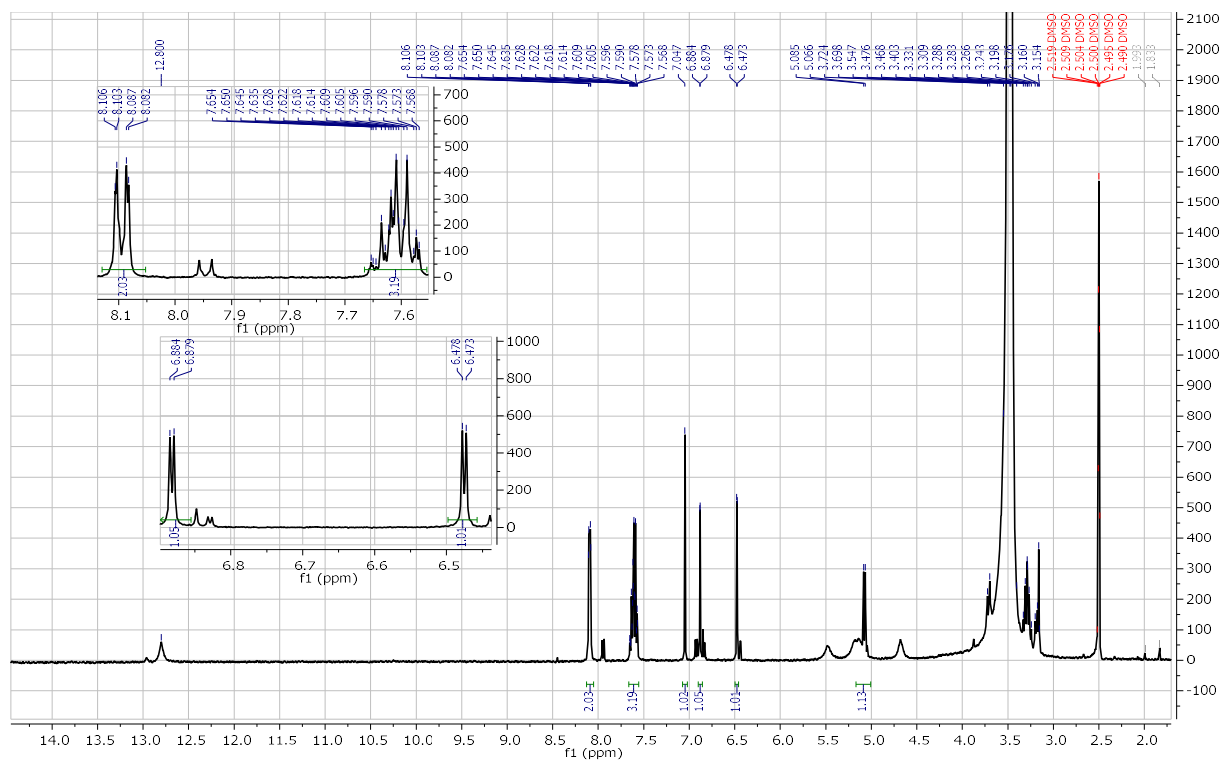

**Figure S7:  $^1\text{H}$  NMR spectrum of compound 3**

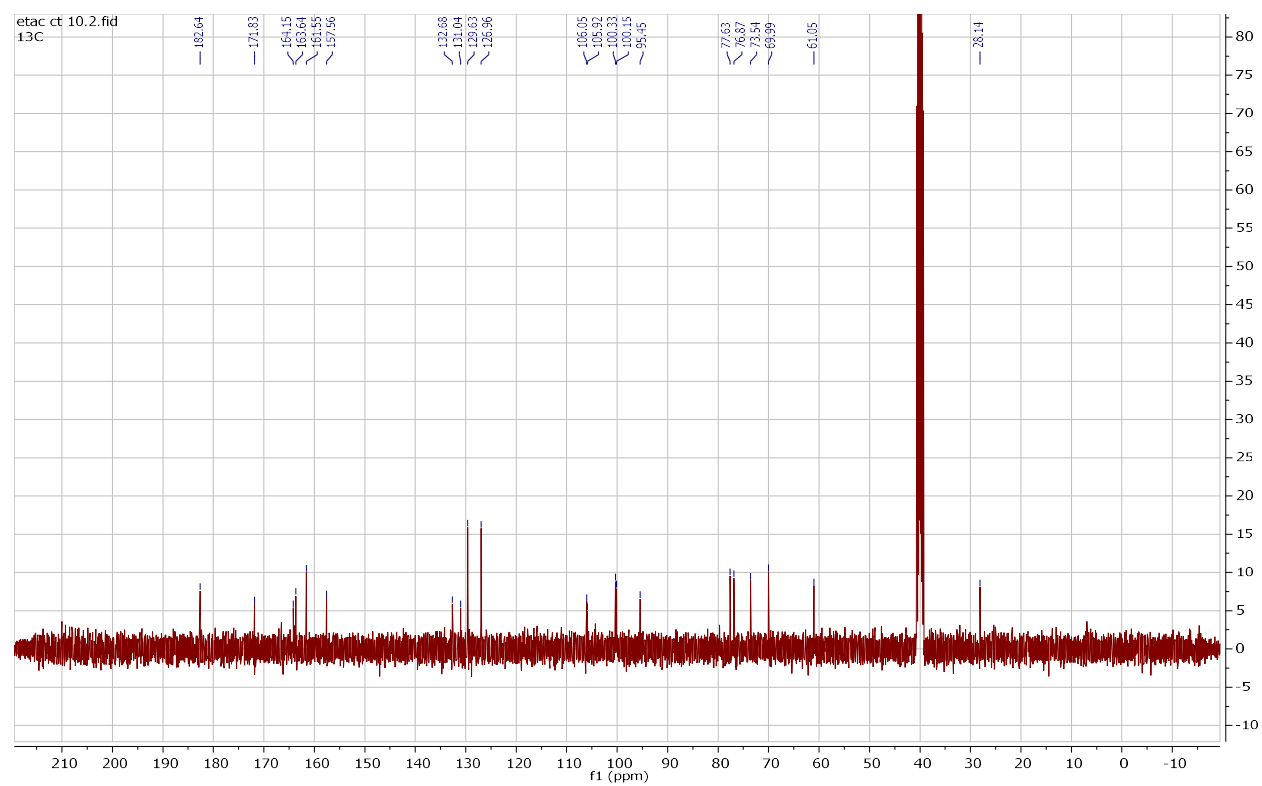

**Figure S8:  $^{13}\text{C}$  NMR spectrum of compound 3**

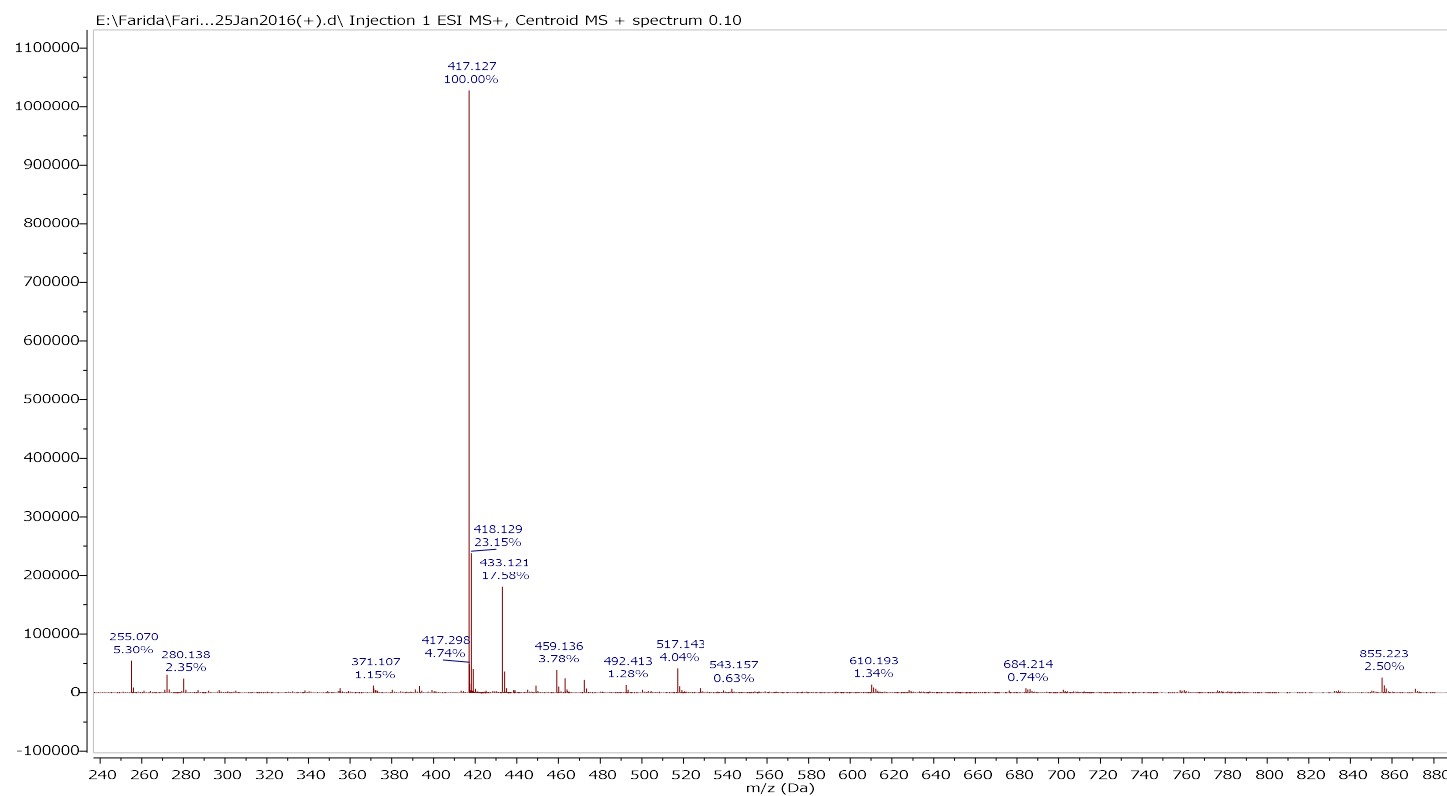

**Figure S9: Negative HRESIMS for compound 3**

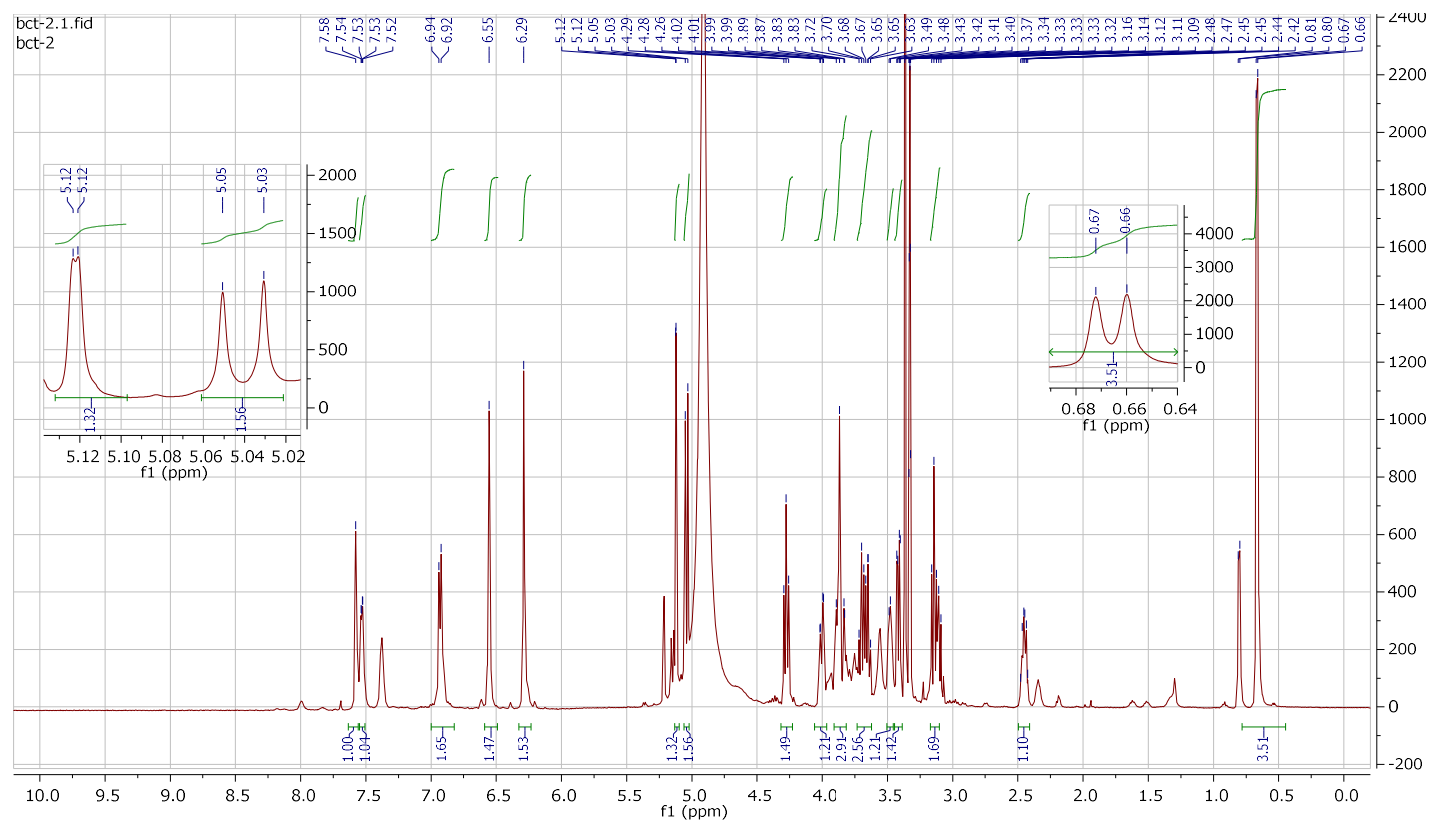

**Figure S10:  $^1\text{H}$  NMR spectrum of compound 4**

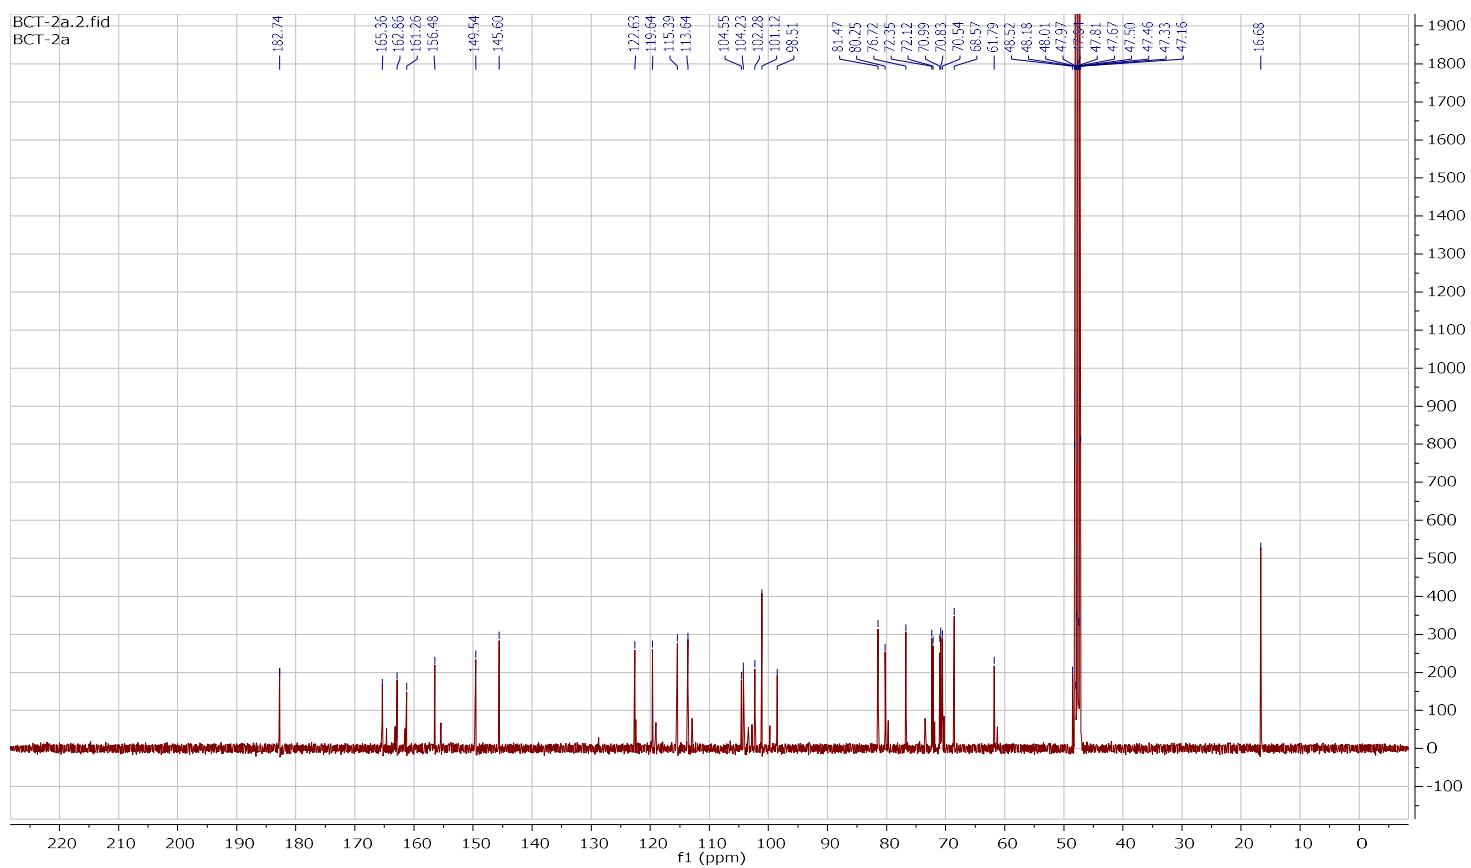

**Figure S11:  $^{13}\text{C}$  NMR spectrum of compound 4**

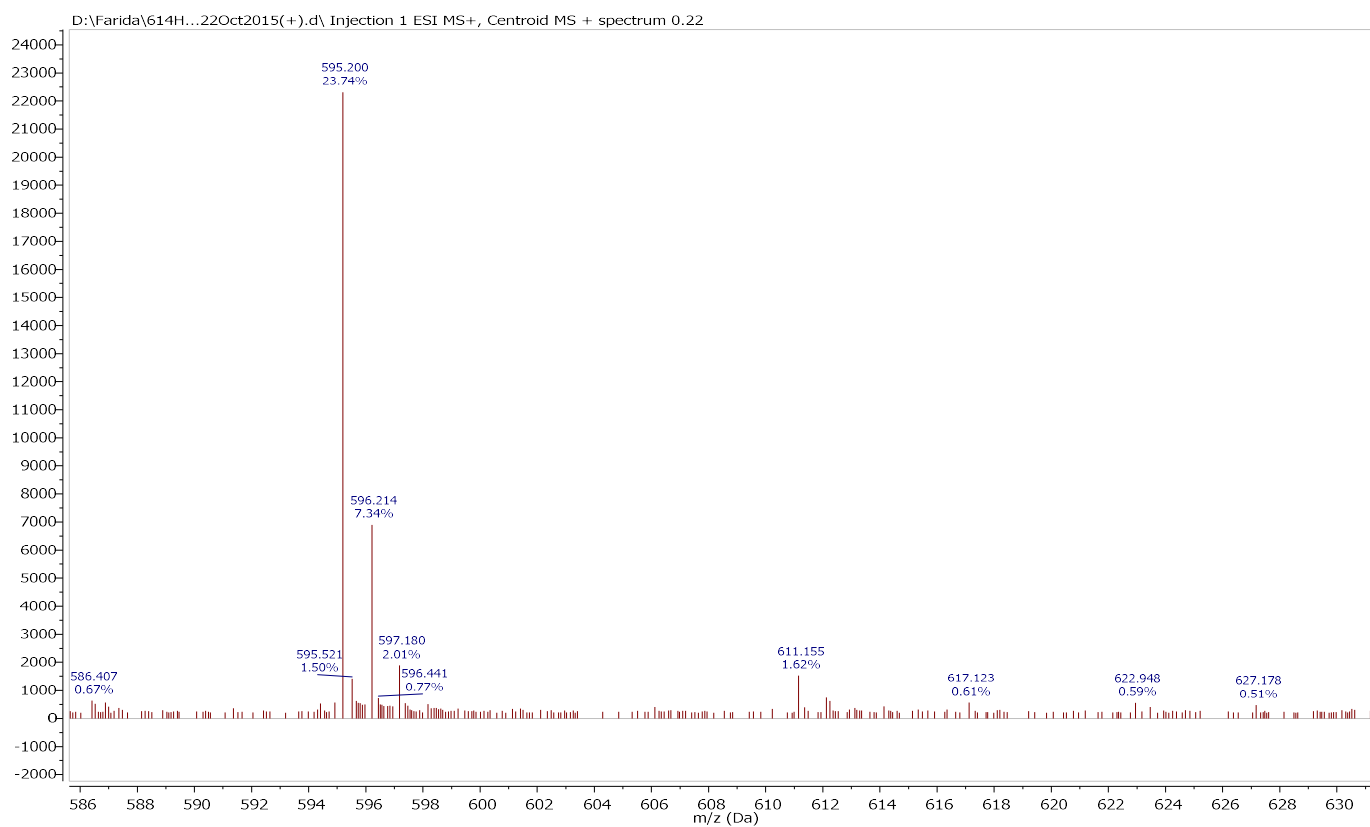

**Figure S12: Negative HRESIMS for compound 4**
